# Supplementary material
Source: PubMed Central journal article supplement (PMC4071548)
Supplement: rspb20140627supp1.pdf [file rspb20140627supp1.pdf]

**Supplementary data: Transitions in social complexity along elevational gradients reveal a combined impact of season length and development time on social evolution**

*Running title: Sociality, development time, and altitude*

Sarah D. Kocher<sup>§,1,\*</sup>, Loïc Pellissier<sup>2,3\*</sup>, Carl Veller<sup>4,5</sup>, Jessica Purcell<sup>3</sup>, Martin A. Nowak<sup>1,4,6</sup>, Michel Chapuisat<sup>3,+</sup>, and Naomi E. Pierce<sup>1,+</sup>

<sup>1</sup>Department of Organismic and Evolutionary Biology, Museum of Comparative Zoology, Harvard University, Cambridge, MA 02138 USA

<sup>2</sup>Arctic Research Centre, Department of Bioscience, Aarhus University, DK-4000 Roskilde, Denmark

<sup>3</sup>Department of Ecology and Evolution, University of Lausanne, Lausanne, Switzerland

<sup>4</sup>Program for Evolutionary Dynamics, Harvard University, Cambridge, MA 02138 USA

<sup>5</sup>Department of Economics, Harvard University, Cambridge, MA 02138 USA

<sup>6</sup>Department of Mathematics, Harvard University, Cambridge, MA 02138 USA

\*These authors contributed equally to this work

+Co-senior authors

§Correspondence should be addressed to [skocher@fas.harvard.edu](mailto:skocher@fas.harvard.edu)

**Table S1.** Experimental data used in this study. Egg-to-adult development time, foraging days, and social structure designations from the literature (with supplementary references at the end of this document).

| Species name         | Sociality | Foraging days | Mean development | References                                                                                     |
|----------------------|-----------|---------------|------------------|------------------------------------------------------------------------------------------------|
| Bombus_muscorum      | high      | 147.94082     |                  | Michener, 1974                                                                                 |
| Bombus_pomorum       | high      | 142.90494     |                  | Michener, 1974                                                                                 |
| Bombus_distinguendus | high      | 139.64638     |                  | Michener, 1974                                                                                 |
| Bombus_confusus      | high      | 137.71312     |                  | Michener, 1974                                                                                 |
| Bombus_ruderatus     | high      | 135.16582     |                  | Bourke, 1997; Sakagami & Katayama, 1977                                                        |
| Bombus_campestris    | high      | 121.75652     |                  | Michener, 1974                                                                                 |
| Bombus_vestalis      | high      | 116.45526     |                  | Michener, 1974                                                                                 |
| Bombus_veteranus     | high      | 111.7013      |                  | Michener, 1974                                                                                 |
| Bombus_terrestris    | high      | 111.37092     | 25.5             | Bourke, 1997; Laverty & Plowright, 1985, Del Castillo & Fairbairn, 2012; Wenseleers & AI, 2006 |
| Bombus_pascuorum     | high      | 106.63812     |                  | Michener, 1974                                                                                 |
| Bombus_argillaceus   | high      | 106.22276     |                  | Michener, 1974                                                                                 |
| Bombus_humilis       | high      | 104.61458     |                  | Michener, 1974                                                                                 |
| Bombus_lapidarius    | high      | 103.98566     |                  | Del Castillo & Fairbairn, 2012; Winston, 1991                                                  |
| Bombus_sylvarum      | high      | 103.0321      |                  | Del Castillo & Fairbairn, 2012                                                                 |
| Bombus_barbutellus   | high      | 101.8957      |                  | Michener, 1974                                                                                 |
| Bombus_hypnorum      | high      | 101.8128      |                  | Bourke, 1997; Michener, 1974                                                                   |
| Bombus_hortorum      | high      | 99.459176     |                  | Del Castillo & Fairbairn, 2012; Michener, 1974; Michener, 1974; Sakagami, 1976                 |
| Bombus_sylvestris    | high      | 99.415638     |                  | Michener, 1974                                                                                 |
| Bombus_bohemicus     | high      | 94.02081      |                  | Michener, 1974                                                                                 |
| Bombus_lucorum       | high      | 89.39406      |                  | Bourke, 1997; Del Castillo & Fairbairn, 2012; Sakagami, 1976; 1976                             |
| Bombus_pratorum      | high      | 85.068156     |                  | Free, 1955; Gonzalez & Mejia, 2004                                                             |
| Bombus_subterraneus  | high      | 74.920438     |                  | Michener, 1974                                                                                 |
| Bombus_magnus        | high      | 74.72998      |                  | Michener, 1974                                                                                 |
| Bombus_norvegicus    | high      | 74.11919      |                  | Michener, 1974                                                                                 |

|                     |      |           |      |                                                                                           |
|---------------------|------|-----------|------|-------------------------------------------------------------------------------------------|
| Bombus_rupestris    | high | 68.44023  |      | Michener, 1974                                                                            |
| Bombus_quadricolor  | high | 61.57486  |      | Michener, 1974                                                                            |
| Bombus_cryptarum    | high | 58.985388 |      | Michener, 1974                                                                            |
| Bombus_jonellus     | high | 56.074472 |      | Michener, 1974                                                                            |
| Bombus_wurflenii    | high | 55.012192 |      | Michener, 1974                                                                            |
| Bombus_ruderarius   | high | 54.361174 |      | Michener, 1974                                                                            |
| Bombus_inexpectatus | high | 54.262844 |      | Michener, 1974                                                                            |
| Bombus_soroeeensis  | high | 53.751726 |      | Michener, 1974                                                                            |
| Bombus_mesomelas    | high | 53.470338 |      | Michener, 1974                                                                            |
| Bombus_flavidus     | high | 47.348408 |      | Michener, 1974                                                                            |
| Bombus_sichelii     | high | 43.9006   |      | Michener, 1974                                                                            |
| Bombus_monticola    | high | 43.476364 |      | Michener, 1974                                                                            |
| Bombus_gerstaeckeri | high | 43.06264  |      | Michener, 1974                                                                            |
| Bombus_mucidus      | high | 42.665376 |      | Michener, 1974                                                                            |
| Bombus_pyrenaesus   | high | 40.616888 |      | Michener, 1974                                                                            |
| Bombus_mendax       | high | 40.426764 |      | Michener, 1974                                                                            |
| Bombus_alpinus      | high | 20.32066  |      | Laverty & Plowright, 1985                                                                 |
| Bombus_atratus      | high |           | 29   | Laverty & Plowright, 1985;Gonzalez & Mejia, 2004                                          |
| Bombus_impatiens    | high |           | 26   | Bourke, 1997; Michener, 1974; Cnaani, Schmid-Hempel, & Schmidt, 2002; Michener, 1974      |
| Bombus_ephippiatus  | high |           | 24   | Del Castillo & Fairbairn, 2012; Michener, 1974                                            |
| Bombus_perplexus    | high |           | 22.5 | Del Castillo & Fairbairn, 2012; Laverty & Plowright, 1985; Michener, 1974                 |
| Bombus_bimaculatus  | high |           | 22   | Del Castillo & Fairbairn, 2012; Sakagami, 1976                                            |
| Bombus_hypocrita    | high |           | 22   | Del Castillo & Fairbairn, 2012; Michener, 1974; Laverty & Plowright, 1985; Michener, 1974 |
| Bombus_ignitus      | high |           | 22   | Del Castillo & Fairbairn, 2012; Mason, 1988; Michener, 1974; Yoon, Kim, & Kim, 2002       |
| Bombus_ternarius    | high |           | 22   | Del Castillo & Fairbairn, 2012                                                            |
| Apis_mellifera      | high |           | 21   | Winston, 1991                                                                             |
| Bombus_fervidus     | high |           | 20.5 | Sakagami And Katayama 1980                                                                |
| Bombus_polaris      | high |           | 20   | Del Castillo & Fairbairn, 2012; Laverty & Plowright, 1985                                 |
| Bombus_vagans       | high |           | 19   | Del Castillo & Fairbairn, 2012                                                            |
| Bombus_affinis      | high |           |      | Bourke, 1997; Sakagami, 1976                                                              |
| Bombus_agrorum      | high |           |      | Cumber, 1949                                                                              |

|                          |              |           |                                                                             |
|--------------------------|--------------|-----------|-----------------------------------------------------------------------------|
| Bombus_appositus         | high         |           | Sakagami And Katayama 1981                                                  |
| Bombus_ardens            | high         |           | Del Castillo & Fairbairn, 2012                                              |
| Bombus_balteaus          | high         |           | Sakagami & Katayama, 1977                                                   |
| Bombus_bifarius          | high         |           | Lavery & Plowright, 1985                                                    |
| Bombus_borealis          | high         |           | Michener, 1974                                                              |
| Bombus_californicus      | high         |           | Michener, 1974; Sakagami & Katayama, 1977                                   |
| Bombus_centralis         | high         |           | {Delcastillo:2012kq}                                                        |
| Bombus_flavifrons        | high         |           | Michener, 1974                                                              |
| Bombus_frigidus          | high         |           | Michener, 1974                                                              |
| Bombus_melanopygus       | high         |           | Bourke, 1997; Cumber, 1949; Lavery & Plowright, 1985                        |
| Bombus_nevadensis        | high         |           | Michener, 1974                                                              |
| Bombus_occidentalis      | high         |           | Lavery & Plowright, 1985; Sakagami & Katayama, 1977                         |
| Bombus_pennsylvanicus    | high         |           | Michener, 1974                                                              |
| Bombus_rufocinctus       | high         |           | Michener, 1974                                                              |
| Bombus_sassaricus        | high         |           | Bourke, 1997; Michener, 1974                                                |
| Bombus_terricola         | high         |           | Bourke, 1997; Sakagami, 1976                                                |
| Bombus_wilmattae         | high         |           | Huth-Schwarz et al. 2011                                                    |
| Lasioglossum_politum     | intermediate | 154.4317  | Danforth et al., 2003                                                       |
| Lasioglossum_malachurum  | intermediate | 146.6934  | Knerer, 1992; Richards, 2000; Wyman & Richards, 2003; Packer & Knerer, 1985 |
| Lasioglossum_lineare     | intermediate | 144.55384 | Knerer, 1983; Packer & Knerer, 1985                                         |
| Lasioglossum_marginatum  | intermediate | 139.37964 | Michener, 1974                                                              |
| Halictus_scabiosae       | intermediate | 138.4544  | Plateaux-Quenu, 1972                                                        |
| Lasioglossum_pauxillum   | intermediate | 137.3926  | Packer & Knerer, 1985                                                       |
| Halictus_subauratus      | intermediate | 131.71848 | Westrich, 1990                                                              |
| Lasioglossum_interruptum | intermediate | 130.4472  | Danforth et al., 2003                                                       |
| Lasioglossum_morio       | intermediate | 130.1395  | Danforth et al., 2003                                                       |
| Lasioglossum_nigripes    | intermediate | 126.5545  | Packer & Knerer, 1985                                                       |
| Halictus_tumulorum       | intermediate | 121.421   | Westrich, 1990                                                              |
| Halictus_sexcinctus      | intermediate | 110.54328 | Richards, 2001                                                              |
| Halictus_maculatus       | intermediate | 108.8383  | Knerer, 1980                                                                |
| Halictus_smaragdulus     | intermediate | 93.30192  | Westrich, 1990                                                              |
| Allodape_ceratinoides    | intermediate |           | Michener, 1974                                                              |
| Allodape_friesei         | intermediate |           | Michener, 1974                                                              |

|                            |              |      |                                                          |
|----------------------------|--------------|------|----------------------------------------------------------|
| Allodape_mucronata         | intermediate |      | Michener, 1974                                           |
| Allodape_panurgoides       | intermediate |      | Michener, 1974                                           |
| Allodape_rufogastra        | intermediate |      | Michener, 1974                                           |
| Allodapula_acutigera       | intermediate |      | Michener, 1974                                           |
| Allodapula_dichroa         | intermediate |      | Michener, 1974                                           |
| Allodapula_exoloma         | intermediate |      | Mason, 1988; Michener, 1974                              |
| Allodapula_melanopus       | intermediate |      | Michener, 1974                                           |
| Allodapula_turneri         | intermediate |      | Michener, 1974                                           |
| Allodapula_variegata       | intermediate |      | Michener, 1974                                           |
| Braunsapis_bouyssoui       | intermediate |      | Michener, 1974                                           |
| Braunsapis_draconis        | intermediate |      | Michener, 1974                                           |
| Braunsapis_facialis        | intermediate |      | Michener, 1974                                           |
| Braunsapis_foveata         | intermediate |      | Mason 1988                                               |
| Braunsapis_leptozonia      | intermediate |      | Michener, 1974                                           |
| Braunsapis_luapulana       | intermediate |      | Michener, 1974                                           |
| Braunsapis_simplicipes     | intermediate |      | Michener, 1974                                           |
| Braunsapis_stuckenbergorum | intermediate |      | Michener, 1974                                           |
| Exoneura_hamulata          | intermediate |      | Michener, 1974                                           |
| Exoneura_variabilis        | intermediate |      | Michener, 1974                                           |
| Exoneurella_lawsoni        | intermediate |      | Michener, 1974                                           |
| Halterapis_nigrinervis     | intermediate |      | Chenoweth, Tierney, Smith, Cooper, & Schwarz, 2007       |
| Augochlorella_persimilis   | intermediate | 39   | Ordway, 1966                                             |
| Augochlorella_striata      | intermediate | 39   | U. G. Mueller, 1996; Packer, 1990                        |
| Agapostemon_nasutus        | intermediate | 37.5 | Roberts, 1969; 1973                                      |
| Lasioglossum_aeneiventre   | intermediate | 35   | Wcislo, Wille, & Orozco, 1993                            |
| Lasioglossum_laevissimum   | intermediate | 35   | Packer, 1992                                             |
| Megalopta_genalis          | intermediate | 35   | Wcislo & Gonzalez, 2006; Wcislo, Arneson, & Roesch, 2004 |
| Lasioglossum_duplex        | intermediate | 34.5 | Packer & Knerer, 1985                                    |
| Agapostemon_texanus        | intermediate | 32   | Roberts, 1969; 1973                                      |
| Halictus_farinosus         | intermediate | 28   | G. C. Eickwort, 1985                                     |
| Halictus_ligatus           | intermediate | 28   | Packer, 1986; Richards, 2001; Roberts, 1973              |
| Lasioglossum_imitatum      | intermediate | 25.5 | Danforth et al., 2003                                    |
| Lasioglossum_rohweri       | intermediate | 25.5 | Michener, 1974; Breed 1975                               |
| Lasioglossum_umbripenne    | intermediate | 22   | Danforth et al., 2003                                    |

|                               |              |           |                                                            |
|-------------------------------|--------------|-----------|------------------------------------------------------------|
| Augochlora_nominata           | intermediate |           | G. C. Eickwort & Eickwort, 1972                            |
| Halictus_poeyi                | intermediate |           | Knerer, 1980                                               |
| Lasioglossum_breedi           | intermediate |           | Michener, 1974                                             |
| Lasioglossum_laticeps         | intermediate |           | Danforth et al., 2003                                      |
| Lasioglossum_lineatulum       | intermediate |           | G. C. Eickwort, Eickwort, Gordon, Eickwort, & Wcislo, 1996 |
| Lasioglossum_ohei             | intermediate |           | Sakagami & Hayashida 1968                                  |
| Lasioglossum_rhytidiphorum    | intermediate |           | Sakagami & Hayashida 1968                                  |
| Lasioglossum_seabrui          | intermediate |           | Michener, 1974                                             |
| Lasioglossum_versatum         | intermediate |           | Michener, 1966                                             |
| Lasioglossum_zephyrum         | intermediate |           | Danforth et al., 2003                                      |
| Pseudagapostemon_divaricatus  | intermediate |           | Michener & Lange, 1958                                     |
| Pseudaugochloropsis_graminea  | intermediate |           | Michener & Kerfoot, 1967                                   |
| Pseudaugochloropsis_nigerrima | intermediate |           | Michener & Kerfoot, 1967                                   |
| Systropha_planidens           | solitary     | 164.4272  | Michener, 1974                                             |
| Systropha_curvicornis         | solitary     | 160.8967  | Michener, 1974                                             |
| Lasioglossum_lucidulum        | solitary     | 144.76966 | Danforth et al., 2003                                      |
| Lasioglossum_limbellum        | solitary     | 141.68608 | Danforth et al., 2003                                      |
| Lasioglossum_majus            | solitary     | 140.6014  | Boesi, Polidori, & Andrietti, 2008                         |
| Lasioglossum_puncticolle      | solitary     | 138.41752 | Danforth et al., 2003                                      |
| Rophites_quinquespinosus      | solitary     | 135.98898 | Michener, 1974                                             |
| Lasioglossum_zonulum          | solitary     | 134.4815  | Stoeckhert, 1933                                           |
| Lasioglossum_villosulum       | solitary     | 127.7814  | Danforth et al., 2003                                      |
| Lasioglossum_lativentre       | solitary     | 126.0838  | Westrich, 1990                                             |
| Halictus_confusus             | solitary     | 116.8145  | Roberts, 1973                                              |
| Lasioglossum_leucozonium      | solitary     | 110.9423  | Atwood, 1933; Stoeckhert, 1933                             |
| Lasioglossum_fulvicorne       | solitary     | 100.9251  | Danforth et al., 2003                                      |
| Rhophitoides_canus            | solitary     | 94.838372 | Wilkaniac, Wójtowski, & Szymas, 1985                       |
| Halictus_quadricinctus        | solitary     | 94.34113  | Knerer, 1980                                               |
| Lasioglossum_xanthopus        | solitary     | 94.34113  | Packer, 1998                                               |
| Rophites_algirus              | solitary     | 94.34113  | Michener, 1974                                             |
| Lasioglossum_costulatum       | solitary     | 94.061242 | Stoeckhert, 1933                                           |

|                         |          |           |       |                                                                      |
|-------------------------|----------|-----------|-------|----------------------------------------------------------------------|
| Lasioglossum_brevicorne | solitary | 93.30192  |       | Danforth, Conway, & Ji, 2003                                         |
| Lasioglossum_laevigatum | solitary | 93.18486  |       | Stoeckert, 1933                                                      |
| Halictus_eurygnathus    | solitary | 90.408066 |       | Oertli, Mueller, & Dorn, 2005                                        |
| Halictus_rubicundus     | solitary | 88.976852 |       | Soucy & Danforth, 2002; Plateaux-Quenu, Plateaux, & Packer, 2000     |
| Lasioglossum_albipes    | solitary | 84.74418  |       | Plateaux-Quenu, 1992                                                 |
| Tetrapedia_maura        | solitary |           | 113   | Thiele & Inouye, 2007                                                |
| Centris_vittata         | solitary |           | 98.5  | Thiele & Inouye, 2007                                                |
| Xylocopa_varians        | solitary |           | 70    | Thiele & Inouye, 2007                                                |
| Centris_labrosa         | solitary |           | 61.5  | Thiele & Inouye, 2007                                                |
| Ptilothrix_plumata      | solitary |           | 60    | *Same Season Eggs; Martins & Guerra, 2001                            |
| Centris_analis          | solitary |           | 59    | Thiele & Inouye, 2007; Vieira & Garófalo, 2000                       |
| Centris_biocornuta      | solitary |           | 58    | Thiele & Inouye, 2007; Vinson & Frankie, 2000                        |
| Ceratina_smaragdula     | solitary |           |       | Kapil & Kumar, 1969; Rehan, Richards, & Schwarz, 2009                |
| Euplusia_surinamensis   | solitary |           |       | Michener, 1971; Bennett, 1972 ; Dodson, 1966; Myers & Loveless, 1976 |
| Lasioglossum_baleicum   | solitary |           | 41.5  | Cronin & Hirata, 2003; Hirata & Higashi, 2008                        |
| Augochlora_pura         | solitary |           | 37.5  | Stockhammer, 1966                                                    |
| Lasioglossum_apristum   | solitary |           |       | Miyanaaga, Maeta, & Sakagami, 1999                                   |
| Neocorynura_fumipennis  | solitary |           |       | Michener, Kerfoot, And Ramirez, 1966                                 |
| Osmia_rufa              | solitary |           | 109.8 | Thiele & Inouye, 2007                                                |
| Osmia_lignaria          | solitary |           | 97.1  | Bosch & Kemp, 2000                                                   |
| Duckeanthidium_thielei  | solitary |           | 69.5  | Thiele, 2002; Thiele & Inouye, 2007                                  |
| Megachile_rotundata     | solitary |           | 36.9  | Kemp & Bosch, 2000                                                   |
| Osmia_excavata          | solitary |           |       | Hirashima, 1958                                                      |

---

**Figure S2.** There is a strong correlation between elevation and foraging days.

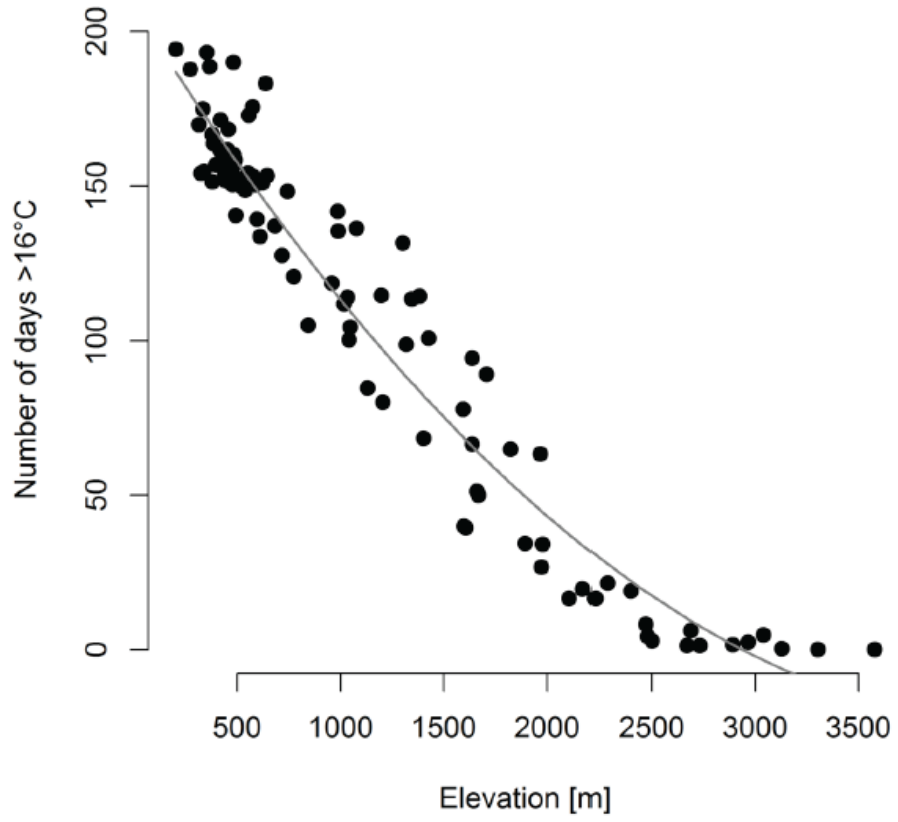



**Table S3.** The correlations (reported as  $R^2$  values) between the number of days with temperatures reaching 12°C, 14°C, 16°C, 18°C, 20°C, 22°C, altitude, and our selected temperature threshold of 16°C. Note that there is a strong correlation between all temperature thresholds and altitude, as well as between the number of days above 16°C and the rest of the temperature thresholds. All correlations were significant ( $p < 0.05$ ).

|                 | <b>Altitude</b> | <b>Days &gt;16°C</b> |
|-----------------|-----------------|----------------------|
| <b>&gt;12°C</b> | -0.969          | 0.988                |
| <b>&gt;14°C</b> | -0.965          | 0.997                |
| <b>&gt;16°C</b> | -0.920          | .                    |
| <b>&gt;18°C</b> | -0.936          | 0.996                |
| <b>&gt;20°C</b> | -0.921          | 0.985                |
| <b>&gt;22°C</b> | -0.896          | 0.955                |

**Figure S4.** A large part of the variation in development times seems to occur *within* subfamilies rather than between them.

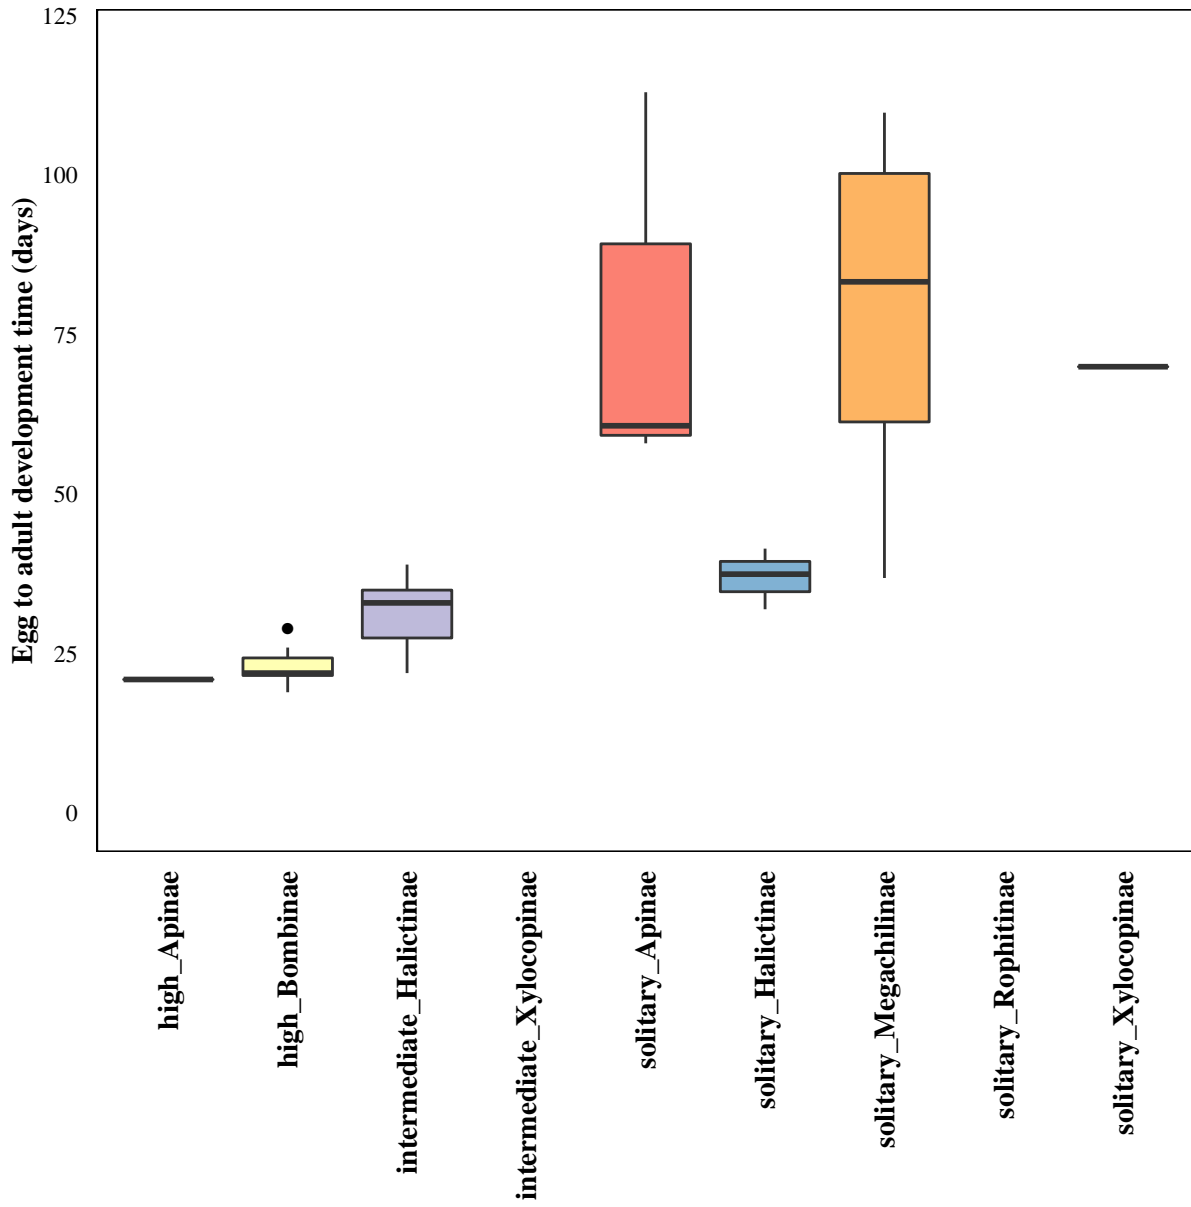

**Figure S5.** These maps illustrate the distributions of each social form across Switzerland. To map these distributions of each behavioural category, “solitary”, “intermediate” and “highly” social, we mapped the probabilities of finding each behavioural form at a given site based on the number of days above 16°C at each site. To complement the observation of species within the three social categories, we used 5000 pseudo-absences representing the background conditions available to the species and then used generalized linear models (GLM) with a binomial distribution and a logistic link function accounting for linear and quadratic relationships.

**Solitary**

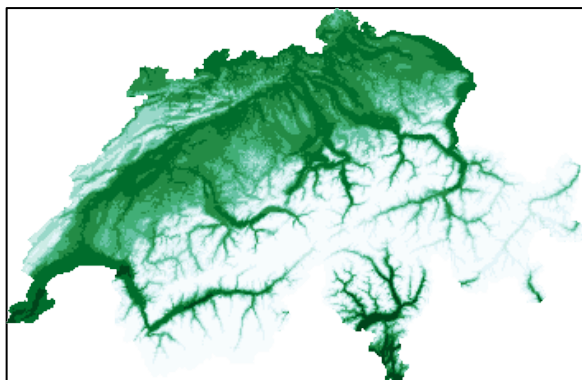

**Intermediate**

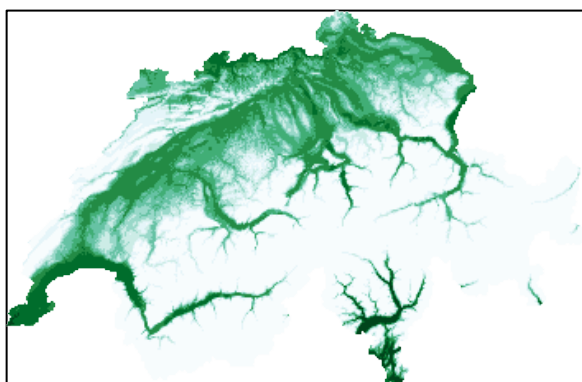

**High**

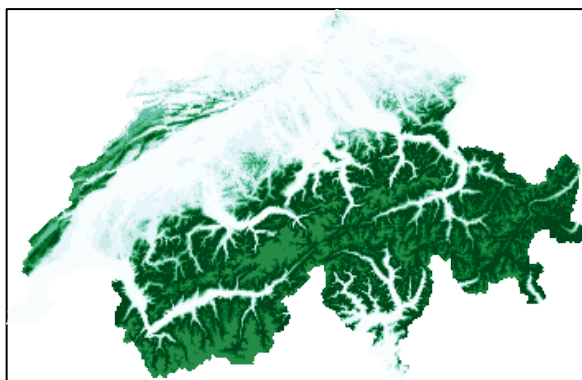

**Figure S6.** Distributions of development time for each social form used in the ecological model. A. Solitary taxa, B. Intermediate social taxa, C. Highly social taxa.

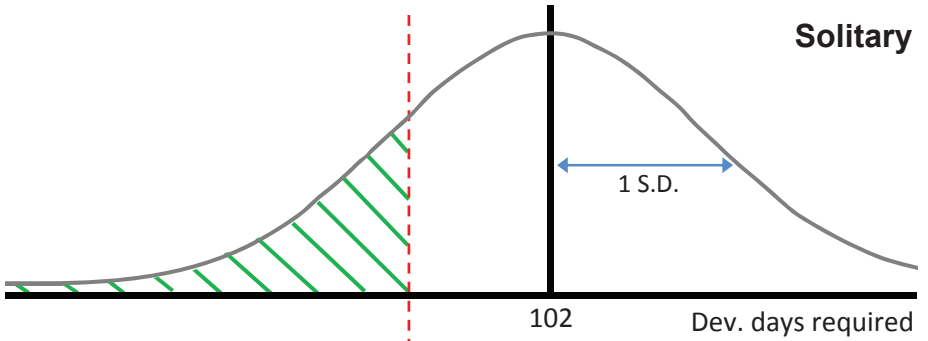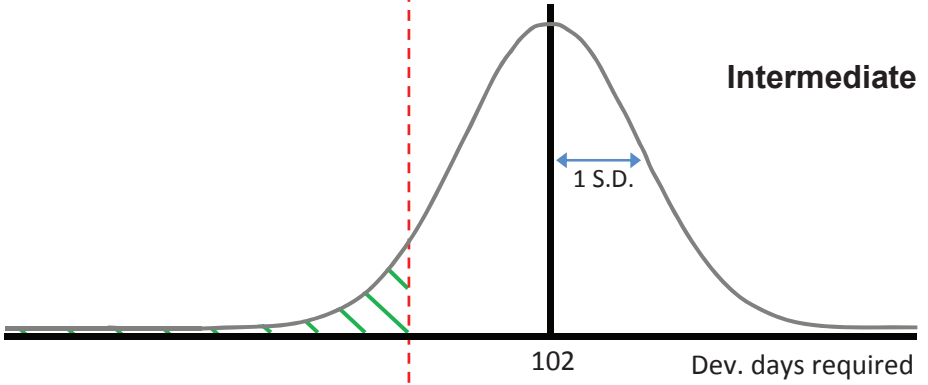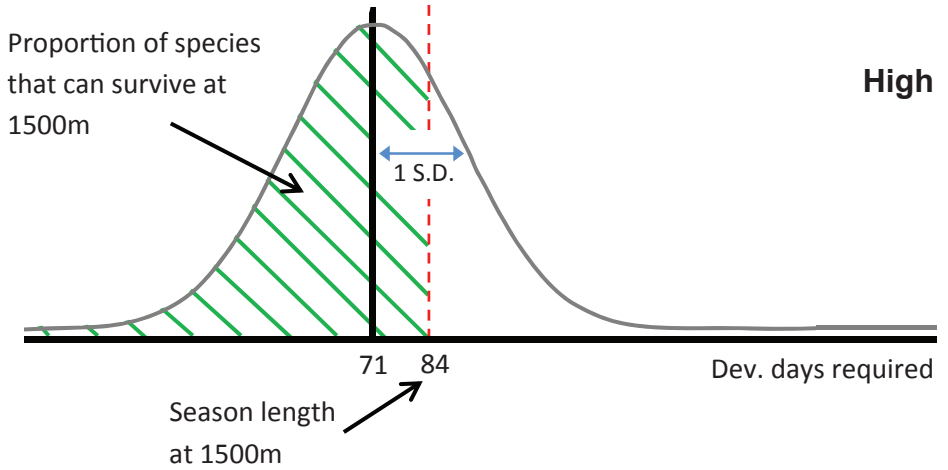

**Figure S7.** The qualitative results of the model are robust to sizable changes in the parameters of the underlying distributions. Here, we report the relative proportions of the three sociality levels across altitude for a range of distribution parameter values. The base case, as in Fig. 4, is shown in the central panel. The means of the distributions increase from left to right; the standard deviations increase from top to bottom.



$\mu \times 0.8$ 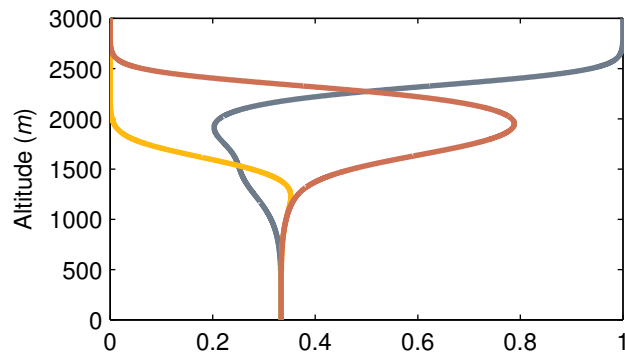 $\mu \times 1.0$ 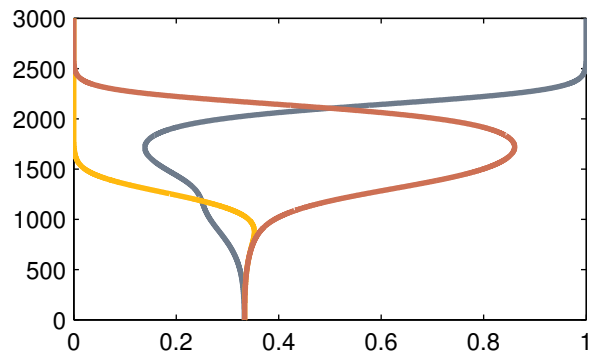 $\mu \times 1.2$ 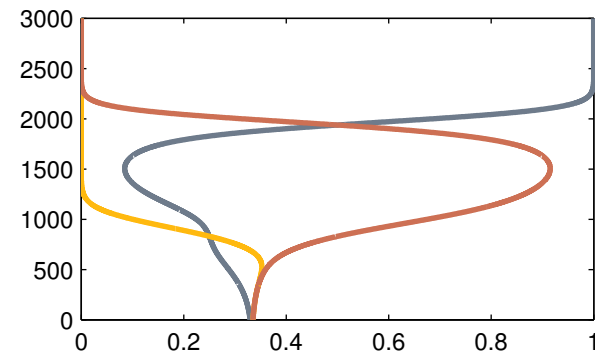 $\sigma \times 0.8$ 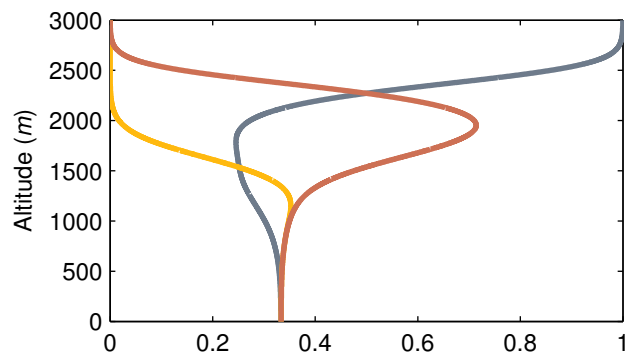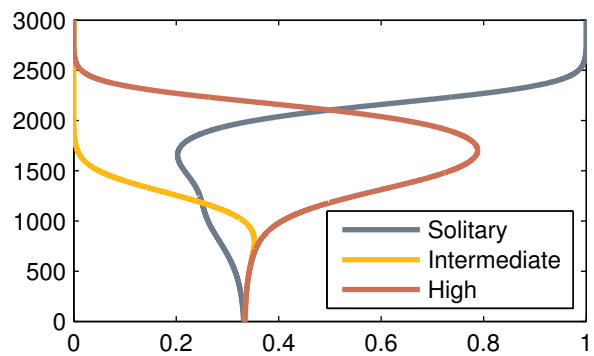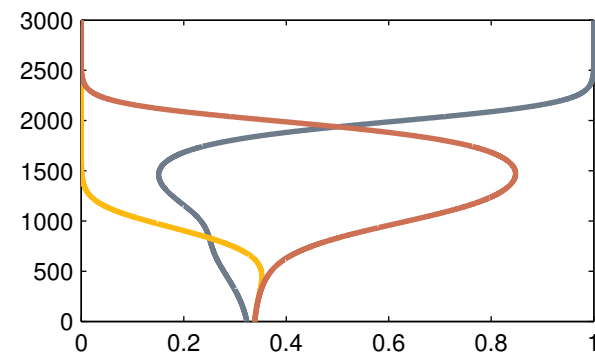 $\sigma \times 1.0$ 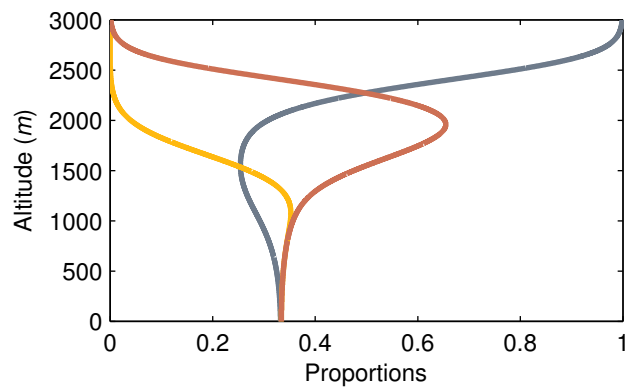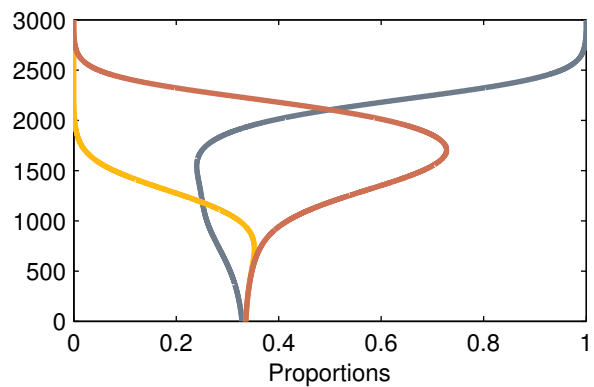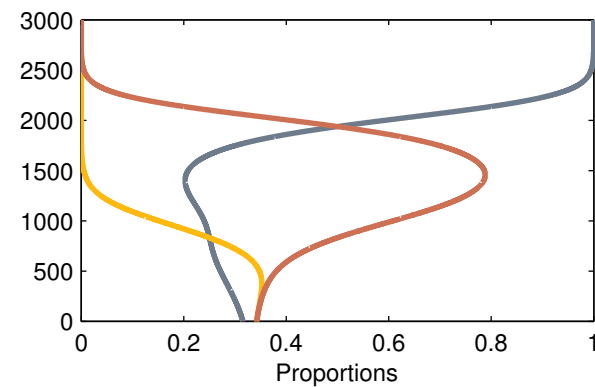 $\sigma \times 1.2$

## Supplementary References.

- 1 Mason, C. A. 1988 Division of labor and adult interactions in eusocial colonies of two allodapine bee species (Hymenoptera: Anthophoridae). *J Kansas Entomol Soc* **61**, 477–491.
- 2 Winston, M. L. 1991 *The Biology of the Honey Bee*. Harvard University Press.
- 3 Bourke, A. F. G. 1997 Sex ratios in bumble bees. *Philosophical Transactions of the Royal Society B: Biological Sciences* **352**, 1921–1933. (doi:10.1098/rstb.1997.0179)
- 4 Sakagami, S. F. 1976 Specific Differences in the Bionomic Characters of Bumblebees. : A Comparative Review (With 4 Text-figures). 北海道大學理學部紀要 = *Journal Of The Faculty Of Science Hokkaido University Series Vi. Zoology* **20**, 390–447.
- 5 Cumber, R. A. 1949 The biology of humble-bees, with special reference to the production of the worker caste. *Transactions of the Royal Entomological Society of London* **100**, 1–45.
- 6 Laverty, T. M. & Plowright, R. C. 1985 Comparative Bionomics of Temperate and Tropical Bumble Bees with Special Reference to *Bombus ephippiatus* (Hymenoptera: Apidae). *Can. Entomol.* **117**, 467–474. (doi:10.4039/Ent117467-4)
- 7 Del Castillo, R. C. & Fairbairn, D. J. 2012 Macroevolutionary patterns of bumblebee body size: detecting the interplay between natural and sexual selection. *Ecol Evol* **2**, 46–57. (doi:10.1002/ece3.65)
- 8 Gonzalez, V. H., Mejia, A. & Rasmussen, C. 2004 Ecology and nesting behavior of *Bombus atratus* Franklin in Andean highlands (Hymenoptera: Apidae). *Journal of Hymenoptera Research* **13**, 28–36.
- 9 Sakagami, S. F. & Katayama, E. 1977 Nests of Some Japanese Bumblebees (Hymenoptera, Apidae) (With 21 Text-figures and 17 Tables). 北海道大學理學部紀要 = *Journal Of The Faculty Of Science Hokkaido University Series VI. ZOOLOGY* **21**, 92–153.
- 10 Yoon, H. J., Kim, S. E. & Kim, Y. S. 2002 Temperature and humidity favorable for colony development of the indoor-reared bumblebee, *Bombus ignitus*. *Appl. Entomol. Zool.* **37**, 419–423. (doi:10.1303/aez.2002.419)
- 11 Cnaani, J., Schmid-Hempel, R. & Schmidt, J. O. 2002 Colony development, larval development and worker reproduction in *Bombus impatiens* Cresson. *Insectes*

*Sociaux* **49**, 164–170.

- 12 Free, J. B. 1955 The behaviour of egg-laying workers of bumblebee colonies. *The British Journal of Animal Behaviour* **3**, 147–153. (doi:10.1016/S0950-5601(55)80053-6)
- 13 Wenseleers, T. & Ratnieks, F. L. W. 2006 Comparative analysis of worker reproduction and policing in eusocial hymenoptera supports relatedness theory. *Am Nat* **168**, E163–79. (doi:10.1086/508619)
- 14 Thiele, R. & Inouye, B. D. 2007 Nesting Biology, Seasonality, and Mating Behavior of *Epicharis metatarsalis* (Hymenoptera: Apidae) in Northeastern Costa Rica. *Ann Entomol Soc Am* **100**, 596–602. (doi:10.1603/0013-8746(2007)100[596:NBSAMB]2.0.CO;2)
- 15 Vieira, B. M. & Garófalo, C. A. 2000 Nesting behaviour of *Centris (Heterocentris) analis* (Fabricius) in southeastern Brazil (Hymenoptera, Apidae, Centridini). *Apidologie* **31**, 503–515.
- 16 Vinson, S. B. & Frankie, G. W. 2000 Nest Selection, Usurpation, and a Function for the Nest Entrance Plug of *Centris bicornuta* (Hymenoptera: Apidae). *Ann Entomol Soc Am* **93**, 254–260. (doi:10.1603/0013-8746(2000)093[0254:NSUAAF]2.0.CO;2)
- 17 Kapil, R. P. & Kumar, S. 1969 Biology of *Ceratina binghami* Ckll. (Ceratini: Hymenoptera). *J Res Punjab Agric Univ* **6**, 359–371.
- 18 Rehan, S. M., Richards, M. H. & Schwarz, M. P. 2009 Evidence of Social Nesting in the *Ceratina* of Borneo (Hymenoptera: Apidae). *J Kansas Entomol Soc* **82**, 194–209. (doi:10.2317/JKES809.22.1)
- 19 Michener, C. D. 1971 Biologies of African allodapine bees. *Bull. Am. Mus. Nat. Hist.* **145**, 219.
- 20 Bennett, F. D. 1972 Observations on *Exaerete* spp. and their hosts *Eulaema terminata* and *Euplusia surinamensis* (Hymen., Apidae, Euglossinae) in Trinidad. *J New York Entomol S* **80**, 118–124.
- 21 Dodson, C. H. 1966 Ethology of some bees of the tribe Euglossini (Hymenoptera: Apidae). *J Kansas Entomol Soc* **39**, 607–629.
- 22 Myers, J. & Loveless, M. D. 1976 Factors affecting induction and termination of diapause in pear *Psylla* (Homoptera: Psyllidae). *Can. Entomol.* **108**, 1001–1005. (doi:10.4039/Ent1081001-9)

- 23 Chenoweth, L. B., Tierney, S. M., Smith, J. A., Cooper, S. J. & Schwarz, M. P. 2007 Social complexity in bees is not sufficient to explain lack of reversions to solitary living over long time scales. *BMC Evolutionary Biology* **7**, 246. (doi:10.1186/1471-2148-7-246)
- 24 Martins, R. P., Guerra, S. T. M. & Barbeitos, M. S. 2001 Variability in egg-to-adult development time in the bee *Ptilothrix plumata* and its parasitoids. *Ecological Entomology* **26**, 609–616. (doi:10.1046/j.1365-2311.2001.00353.x)
- 25 Cowan, D. P. 1991 The solitary and presocial Vespidae. *The Social Biology of Wasps*, 33–73.
- 26 Roberts, R. B. 1969 Biology of the bee genus *Agapostemon* (Hymenoptera, Halictidae).
- 27 Roberts, R. B. 1973 Bees of northwestern America: *Halictus* (Hymenoptera: Halictidae).
- 28 Eickwort, G. C. & Stage, G. I. 1972 A new subgenus of neotropical Sphecodes cleptoparasitic upon *Dialictus* (Hymenoptera: Halictidae, Halictinae). *J Kansas Entomol Soc* **45**, 500–515.
- 29 Stockhammer, K. A. 1966 Nesting habits and life cycle of a sweat bee, *Augochlora pura* (Hymenoptera: Halictidae). *J Kansas Entomol Soc* **39**, 157–192.
- 30 Ordway, E. 1966 The bionomics of *Augochlorella striata* and *A. persimilis* in eastern Kansas (Hymenoptera: Halictidae). *J Kansas Entomol Soc*, 270–313.
- 31 Mueller, U. G. 1996 Life history and social evolution of the primitively eusocial bee *Augochlorella striata* (Hymenoptera: Halictidae). *J Kansas Entomol Soc* **69**, 116–138.
- 32 Packer, L. 1990 Solitary and eusocial nests in a population of *Augochlorella striata* (Provancher) (Hymenoptera, Halictidae) at the northern edge of its range. *Behavioral Ecology and Sociobiology* **27**, 339–344.
- 33 Oertli, S., Mueller, A. & Dorn, S. 2005 Ecological and seasonal patterns in the diversity of a species-rich bee assemblage (Hymenoptera: Apoidea: Apiformes). *European Journal of Entomology* **102**, 53–63.
- 34 Eickwort, G. C. 1985 The nesting biology of the sweat bee (*Halictus farinosus*) in California, with notes on *Halictus ligatus* (Hymenoptera: Halictidae). *The Pan-Pacific entomologist* **61**, 122–137.

- 35 Packer, L. 1986 Multiple-foundress associations in a temperate population of *Halictus ligatus* (Hymenoptera: Halictidae). *Canadian Journal of Zoology* **64**, 2325–2332.
- 36 Richards, M. H. 2001 Nesting biology and social organization of *Halictus sexcinctus* (Fabricius) in southern Greece. *Can. J. Zool.* **79**, 2210–2220. (doi:10.1139/cjz-79-12-2210)
- 37 Knerer, G. 1980 Biology and social behaviour of bees of the genus *Halictus*. *Zoologische Jahrbucher, Systematik, Ökologie und Geographie der Tiere* **107**, 511–536.
- 38 Soucy, S. L. & Danforth, B. N. 2002 Phylogeography of the socially polymorphic sweat bee *Halictus rubicundus* (Hymenoptera: Halictidae). *Evolution* **56**, 330–341.
- 39 Plateaux-Quenu, C. 1972 *La biologie des abeilles primitives*. Masson & Cie, Paris. Collection Les Grands problèmes de la biologie. Monographie.
- 40 Wcislo, W. T., Wille, A. & Orozco, E. 1993 Nesting biology of tropical solitary and social sweat bees, *Lasioglossum (Dialictus) figueresi* Wcislo and *Lasioglossum (D.) aeneiventre* (Friese) (Hymenoptera: Halictinae). *Insectes Soc.* **40**, 21.
- 41 Miyanaga, R., Maeta, Y. & Sakagami, S. F. 1999 Geographical variation of sociality and size-linked color patterns in *Lasioglossum (Evylaeus) apristum* (Vachal) in Japan (Hymenoptera, Halictidae). *Insectes Sociaux* **46**, 224–232. (doi:10.1007/s000400050138)
- 42 Hirata, M. & Higashi, S. 2008 Degree-day accumulation controlling allopatric and sympatric variations in the sociality of sweat bees, *Lasioglossum (Evylaeus) baleicum* (Hymenoptera: Halictidae). *Behavioral Ecology and Sociobiology* **62**, 1239–1247. (doi:10.1007/s00265-008-0552-1)
- 43 Stoeckert, F. K. 1933 Die biene Frankens (Hym. apid.): eine ökologisch-tiergeographische untersuchug.
- 44 Packer, L. & Knerer, G. 1985 Social evolution and its correlates in bees of the subgenus *Evylaeus* (Hymenoptera; Halictidae). *Behavioral Ecology and Sociobiology* **17**, 143–149. (doi:10.1007/BF00299246)
- 45 Packer, L. 1992 The social organisation of *Lasioglossum (Dialictus) laevisimum*(Smith) in southern Alberta. *Canadian Journal of Zoology* **70**, 1767–1774. (doi:10.1139/z92-244)

- 46 Atwood, C. E. 1933 Studies on the Apoidea of western Nova Scotia with special reference to visitors to apple bloom. *Canadian Journal of Research* **9**, 443–457.
- 47 Boesi, R., Polidori, C. & Andrietti, F. 2008 Biology of *Lasioglossum (L.) majus* (Hymenoptera: Halictidae), a largely solitary sweat bee with behavioural adaptations to communality. *J Ethol* **27**, 361–367. (doi:10.1007/s10164-008-0129-5)
- 48 Wyman, L. M. & Richards, M. H. 2003 Colony social organization of *Lasioglossum malachurum* Kirby (Hymenoptera, Halictidae) in southern Greece. *Insectes Sociaux* **50**, 201–211. (doi:10.1007/s00040-003-0647-7)
- 49 Breed, M. 1976 The evolution of social behavior in primitively social bees: a multivariate analysis. *Evolution* **30**, 234–240.
- 50 Wcislo, W. T. & Gonzalez, V. H. 2006 Social and ecological contexts of trophallaxis in facultatively social sweat bees, *Megalopta genalis* and *M. ecuadoria* (Hymenoptera, Halictidae). *Insectes Sociaux* **53**, 220–225. (doi:10.1007/s00040-005-0861-6)
- 51 Wcislo, W. T., Arneson, L., Roubik, D. W., Roesch, K. & Gonzalez, V. H. 2004 The evolution of nocturnal behaviour in sweat bees, *Megalopta genalis* and *M. ecuadoria* (Hymenoptera: Halictidae): an escape from competitors and enemies? *Biol. J. Linn. Soc.* **83**, 377.
- 52 Michener, C. D. & Kerfoot, W. B. 1967 Nests and social behavior of three species of *Pseudaugochloropsis* (Hymenoptera: Halictidae). *J Kansas Entomol Soc* **40**, 214–232.
- 53 Michener, C. D. & Lange, R. B. 1958 Observations on the behavior of Brazilian halictid bees (Hymenoptera, Apoidea) I. Pseudagapostemon. *Ann Entomol Soc Am* **51**, 155–164.
- 54 Wilkaniec, Z., Wójtowski, F. & Szymas, B. 1985 Some investigations on solitary bee *Rhophitoides canus* Ev.(Apoidea, Halictidae) nesting in alfalfa seed plantations. *Zoologica Poloniae* **32**, 139–149.
- 55 Kemp, W. P. & Bosch, J. 2000 Development and Emergence of the Alfalfa Pollinator *Megachile rotundata* (Hymenoptera: Megachilidae). *Ann Entomol Soc Am* **93**, 904–911. (doi:10.1603/0013-8746(2000)093[0904:DAEOTA]2.0.CO;2)
- 56 Bosch, J. & Kemp, W. P. 2000 Development and Emergence of the Orchard Pollinator *Osmia lignaria* (Hymenoptera: Megachilidae). *en* **29**, 8–13. (doi:10.1603/0046-225X-29.1.8)

- 57 Hirashima, Y. 1958 Comparative studies on the cocoon spinning habits of *Osmia excavata* Alf ken and *Osmia pedicornis* Cockerell (Hymenoptera, Megachilidae). *Departmental Bulletin Paper, Kyushu University, Japan* **16**, 481–497.
- 58 Westrich, P. 1990 *Die Wildbienen Baden-Württembergs*.
- 59 Huth-Schwarz, A., León, A., Vandame, R., Moritz, R. F. A. & Kraus, F. B. 2011 Mating frequency and genetic colony structure of the neotropical bumblebee *Bombus wilmattae* (Hymenoptera: Apidae). *Apidologie* **42**, 519–525. (doi:10.1007/s13592-011-0038-4)
- 60 Huth-Schwarz, A., León, A., Vandame, R., Moritz, R. F. & Kraus, F. B. 2011 Workers dominate male production in the neotropical bumblebee *Bombus wilmattae* (Hymenoptera: Apidae). *Front Zool* **8**, 13. (doi:10.1186/1742-9994-8-13)
- 61 Michener, C. D. 1974 *The Social Behavior of the Bees*. Cambridge, MA: Harvard University Press.
- 62 Cronin, A. L. & Hirata, M. 2003 Social polymorphism in the sweat bee *Lasioglossum (Evyllaesus) baleicum* (Cockerell) (Hymenoptera, Halictidae) in Hokkaido, northern Japan. *Insectes Sociaux* **50**, 379–386. (doi:10.1007/s00040-003-0693-1)
- 63 Eickwort, G. C., Eickwort, J. M., Gordon, J., Eickwort, M. A. & Weislo, W. T. 1996 Solitary behavior in a high-altitude population of the social sweat bee *Halictus rubicundus* (Hymenoptera: Halictidae). *Behavioral Ecology and Sociobiology* **38**, 227–233. (doi:10.1007/s002650050236)
- 64 Plateaux-Quenu, C. 1992 Comparative Biological Data in 2 Closely Related Eusocial Species - *Evyllaesus calceatus* (Scop) and *Evyllaesus albipes* (F) (Hym, Halictinae). *Insectes Sociaux* **39**, 351–364.
- 65 Plateaux-Quenu, C., Plateaux, L. & Packer, L. 2000 Population-typical behaviours are retained when eusocial and non-eusocial forms of *Evyllaesus albipes* (F.) (Hymenoptera, Halictidae) are reared simultaneously in the laboratory. *Insectes Sociaux* **47**, 263–270.
